# Supplementary material for: A narrative review of the migration and invasion features of non-small cell lung cancer cells upon xenobiotic exposure: insights from in vitro studies
Source: PubMed Central journal article supplement — Transl Lung Cancer Res. 2021 Jun;10(6):2698–714. doi: 10.21037/tlcr-21-121 (PMC8264350; doi:10.21037/tlcr-21-121), 2021-06
Supplement: tlcr-10-06-2698-supplementary.pdf [file tlcr-10-06-2698-supplementary.pdf]

**Table S1** Main *in vitro* assays used to assess migration and invasion in NSCLC cells

| Assay                                      | Endpoint                 | Information                                | Ref.                                                                                                                     |
|--------------------------------------------|--------------------------|--------------------------------------------|--------------------------------------------------------------------------------------------------------------------------|
| <b>Migration</b>                           |                          |                                            |                                                                                                                          |
| Transwell migration assay (Boyden chamber) | Number of migrated cells | Single-cell migration, chemotaxis          | (9-12,24-32,34-40,46,55,56,64,69,71,72,74,79,83,88,89,96,97,99,103,108,109,111,114,122,123,125,127)                      |
| Wound-healing (scratch) assay              | Migration area/width     | Collective migration, EMT                  | (4,24,25,27-32,34,39,45,46,48,50,51,53,54,56-62,65,67,68,70-73,75,76,77,79-81,83-92,94-102,104-114,116-124,126,127)      |
| Fence assay                                | Migration area           | Collective migration, EMT                  | (18)                                                                                                                     |
| Time-lapse cell tracking                   | Cell migration path      | Collective or single-cell migration        | (19,20,63)                                                                                                               |
| Cell exclusion zone assay                  | Migration area           | Collective migration, EMT                  | (19,21,22,66)                                                                                                            |
| Spheroid migration assay                   | Migration area           | Migration from cell cluster                | (23)                                                                                                                     |
| <b>Invasion</b>                            |                          |                                            |                                                                                                                          |
| Transwell invasion assay (Boyden chamber)  | Number of invasive cells | Single-cell invasion through ECM           | (4,11,12,25-29,31,32,34-40,45,46,48,50-55,57,59,60,62-64,67,68,71,73-77,79,80-89,92-103,105,109,110-113,115,117,120-127) |
| Spheroid invasion assay                    | Invasion area            | Single or collective invasion from cluster | (21,47)                                                                                                                  |
| 3D cell tracking                           | Invasion distance        | Single-cell invasion                       | (47)                                                                                                                     |
| Gelatin zymography                         | Zymograms                | MMPs activity                              | (26,28,40,45,46,62,77,79,91,98,102,114,119,123)                                                                          |

3D, three-dimensional; EMT, epithelial to mesenchymal transition; ECM, extracellular matrix; MMPs, matrix metalloproteinases

**Table S2** Overview of *in vitro* studies on migration and invasion of NSCLC cells exposed to lung carcinogens and other toxic contaminants

| Group         | Carcinogen/Contaminant | NSCLC cell line                                                        | Methodology (concentrations used*)                                                 | Key findings**                                                                                                                                                                                                          | Ref. |  |
|---------------|------------------------|------------------------------------------------------------------------|------------------------------------------------------------------------------------|-------------------------------------------------------------------------------------------------------------------------------------------------------------------------------------------------------------------------|------|--|
| Tobacco smoke | B(a)P                  | A549                                                                   | Transwell migration and invasion assays (10 nM and 1,000 nM)                       | B(a)P significantly increased cell migration and invasion through up-regulating IL-8, CCL2, and CCL3 expression                                                                                                         | (55) |  |
|               |                        | A549, YTMLC                                                            | Wound-healing assay                                                                | B(a)P increased the number of metastatic cells and TNF- $\alpha$ had a role in this development                                                                                                                         | (56) |  |
|               |                        |                                                                        | Transwell migration assay (1, 2, 5, 10 and 20 $\mu$ M)                             |                                                                                                                                                                                                                         |      |  |
|               | Cadmium                | A549                                                                   | Wound-healing assay (10 $\mu$ M and 20 $\mu$ M)                                    | Notch1, along with HIF-1 $\alpha$ and IGF-1R/Akt/ERK/S6K1 signalling pathways, promote malignant progression stimulated by Cd                                                                                           | (58) |  |
|               |                        |                                                                        | Transwell migration and invasion assays (2 $\mu$ M)                                | Upregulation of HMGA2 plays an important role in Cd-enhanced migration and invasion                                                                                                                                     | (37) |  |
|               |                        |                                                                        | Transwell migration and invasion assays (not stated)                               | Cd induced an increase in cell migration and invasion by promoting autophagy                                                                                                                                            | (38) |  |
|               |                        |                                                                        | Wound-healing assay                                                                | TGIF might play a crucial role in invasion and migration of cells exposed to Cd                                                                                                                                         | (57) |  |
|               |                        |                                                                        | Transwell invasion assay (0.5 $\mu$ M and 1 $\mu$ M)                               |                                                                                                                                                                                                                         |      |  |
|               |                        |                                                                        | Transwell migration and invasion assays (0.5 $\mu$ M and 2 $\mu$ M)                | Exposure to Cd increased the expression of p-ERK, enhancing migration and invasion                                                                                                                                      | (35) |  |
|               | Nicotine               | A549, H1299                                                            | Transwell invasion assay (100 $\mu$ g/mL)                                          | Nicotine promoted cell migration through upregulation of LINC00460                                                                                                                                                      | (52) |  |
|               |                        | A549                                                                   | Wound-healing assay                                                                | Nicotine induced proliferation, invasion, and migration of tumor cells through the mediation of $\alpha$ 7-nAChRs                                                                                                       | (50) |  |
|               |                        |                                                                        | Transwell invasion assay (0.01, 0.1 and 1 $\mu$ M)                                 |                                                                                                                                                                                                                         |      |  |
|               |                        | A549, H1650                                                            | Wound-healing assay                                                                | ID1, after induction by nicotine, promoted migration and invasion by increasing the expression of <i>STMN3</i> and <i>GSPT1</i> genes                                                                                   | (51) |  |
|               | NNK                    | H1299                                                                  | Transwell invasion assay (1 $\mu$ M)                                               |                                                                                                                                                                                                                         |      |  |
|               |                        |                                                                        | Wound-healing assay                                                                | NNK activated the c-Src/PKC $\gamma$ /FAK loop, which promoted metastasis                                                                                                                                               | (53) |  |
|               |                        | Cell migration assay kit                                               |                                                                                    |                                                                                                                                                                                                                         |      |  |
| A549, H157    |                        | Transwell invasion assay (100 pM)                                      |                                                                                    |                                                                                                                                                                                                                         |      |  |
| Air pollution | BPA                    | A549                                                                   | Wound-healing assay                                                                | Twist protein and mRNA expression were increased by NNK, and it was necessary for NNK promotion of migration and invasion                                                                                               | (54) |  |
|               |                        |                                                                        | Transwell invasion assay (2 and 5 $\mu$ M)                                         |                                                                                                                                                                                                                         |      |  |
|               |                        |                                                                        | Transwell migration and invasion assays (10 $\mu$ M)                               |                                                                                                                                                                                                                         |      |  |
|               | gNO                    | A549                                                                   | Wound-healing assay                                                                | BPA can promote the <i>in vitro</i> migration and invasion via upregulation of MMPs and GPER/EGFR/ERK1/2 signals                                                                                                        | (34) |  |
|               |                        |                                                                        | Transwell invasion assay                                                           | Snail-1/Cx43/ERR $\gamma$ was identified as a novel signalling pathway through which BPA promoted metastasis                                                                                                            | (63) |  |
|               |                        |                                                                        | Gelatin zymography (1.0, 2.5, and 5.0 $\mu$ M)                                     |                                                                                                                                                                                                                         |      |  |
|               | Oxy-PAHs               | A549                                                                   | Wound-healing assay                                                                | gNO promoted metastasis through a mechanism involving the iNOS-dependent MMP-2 activity                                                                                                                                 | (62) |  |
|               |                        |                                                                        | Transwell migration assay (0.16, 0.8, 4, 20 and 100 $\mu$ M)                       |                                                                                                                                                                                                                         |      |  |
|               |                        |                                                                        | Transwell invasion assay                                                           | Exposure to Oxy-PAHs (9-fluorenone) induced invasion and migration of cells by the activation of EMT                                                                                                                    | (24) |  |
|               | PM2.5                  | A549                                                                   | Wound-healing assay                                                                | PM2.5 exposure induced ROS, which activates loc146880 expression. The lncRNA, in turn, up-regulates autophagy and promotes malignant behaviour. Both loc146880 and autophagy promoted cell migration, invasion, and EMT | (59) |  |
|               |                        |                                                                        | Transwell invasion assay (16 $\mu$ g/cm <sup>2</sup> )                             |                                                                                                                                                                                                                         |      |  |
|               |                        | A549, H1299                                                            | Wound-healing assay (50 $\mu$ g/cm <sup>2</sup> )                                  | PM2.5 exposure induced proliferation and motility                                                                                                                                                                       | (61) |  |
|               |                        | H1299, H520                                                            | Wound-healing assay                                                                | Cell migration, invasion, EMT and autophagy were enhanced when cells were treated with cigarette smoke extract and PM2.5 alone or in combination                                                                        | (60) |  |
|               | Other                  | AFB1                                                                   | A549                                                                               | Transwell invasion assay (25 $\mu$ g/cm <sup>2</sup> )                                                                                                                                                                  |      |  |
|               |                        |                                                                        | Wound-healing assay (2.5 $\mu$ M)                                                  | AFB1 promoted cell migration through upregulation of IRS2 via induction of Src phosphorylation                                                                                                                          | (65) |  |
| Arecoline     |                        | A549, H520, H460                                                       | Cell exclusion zone assay (40 $\mu$ M)                                             | Arecoline stimulated cell migration by activating the EGFR/c-Src/FAK signalling pathway via mAChR3                                                                                                                      | (66) |  |
| Isoflurane    |                        | A549, H1299                                                            | Wound-healing assay                                                                | Isoflurane activated the Akt-mTOR signalling pathway resulting in the promotion of cells' proliferation, migration, and invasion                                                                                        | (67) |  |
|               |                        | Transwell invasion assay (1 and 2%)                                    |                                                                                    |                                                                                                                                                                                                                         |      |  |
| Riboflavin    | A549, H3255, Calu-6    | Transwell migration and invasion assays (50, 100, 200 and 400 $\mu$ M) | Riboflavin at higher doses increased cell growth as well as invasion and migration | (64)                                                                                                                                                                                                                    |      |  |

$\alpha$ 7-nAChRs, alpha-7 nicotinic receptor; Akt, protein kinase B; AFB1, aflatoxin B1; B(a)P, Benzo(a) pyrene; BPA, Bisphenol A; CCL2, chemokine (C-C motif) ligand 2; CCL3, Chemokine (C-C motif) ligand 3; Cd, Cadmium; c-Src, Proto-oncogene tyrosine-protein kinase Src; Cx43, connexin 43; EGFR, epidermal growth factor receptor; EMT, epithelial to mesenchymal transition; ERK, extracellular-signal-regulated kinase; ERR $\gamma$ , estrogen related receptor gamma; FAK, focal adhesion kinase; gNO, nitric oxide (gaseous); GPER, G protein-coupled estrogen receptor; GSPT1, G1 To S Phase Transition 1; HIF-1 $\alpha$ , Hypoxia-inducible factor 1-alpha; HMGA2, high mobility group A2; ID1, Inhibitor of DNA binding/Differentiation 1; IGF-1R, Insulin-like growth factor 1 receptor; IL-8, interleukin 8; iNOS, nitric oxide synthase (inducible isoform); IRS, insulin receptor substrate; lncRNA, long non-coding RNA; mAChR3, muscarinic acetylcholine receptor 3; MMP, matrix metalloproteinase; mTOR, mammalian target of rapamycin; NNK, Nitrosamine 4-(methylnitrosamino)-1-(3-pyridyl)-1-butanone; PAHs, Polycyclic aromatic hydrocarbons; PKC $\gamma$ , protein kinase C; PM2.5, particulate matters with less than 2.5  $\mu$ m of diameter; S6K1, Ribosomal protein S6 kinase beta-1; STMN3, Stathmin like 3; TGIF, transforming growth interacting factor; TNF- $\alpha$ , Tumor necrosis factor  $\alpha$ . \*In some reports not all the concentrations indicated in this table were used for all the migration/invasion experiments. \*\*Herein are presented the key findings reported by the authors related to migration/invasion and underlying mechanisms, using essentially migration/invasion related-assays. Nonetheless, some of these findings were obtained using other methodologies not provided in this table. In the original manuscript, other findings not related to migration/invasion were also reported.

**Table S3** Overview of *in vitro* studies on migration and invasion of NSCLC cells exposed to natural bioactive compounds

| Group                                | Natural bioactive compound                       | NSCLC cell line                                                                                                                                      | Methodology (concentrations used)*                                                                                                                                                                                   | Key findings**                                                                                                                                                                                                  | Ref.                                                                                                                                                                                                                          |       |
|--------------------------------------|--------------------------------------------------|------------------------------------------------------------------------------------------------------------------------------------------------------|----------------------------------------------------------------------------------------------------------------------------------------------------------------------------------------------------------------------|-----------------------------------------------------------------------------------------------------------------------------------------------------------------------------------------------------------------|-------------------------------------------------------------------------------------------------------------------------------------------------------------------------------------------------------------------------------|-------|
| Polyphenols non-flavonoids           | Curcumin                                         | 801D                                                                                                                                                 | Wound-healing assay Transwell invasion assay (10 µM)                                                                                                                                                                 | Low toxicity levels of curcumin suppressed migration and invasion through inhibition of Rac1/PAK1 signalling pathway and MMP-2/9 expression                                                                     | (68)                                                                                                                                                                                                                          |       |
|                                      |                                                  | A549 H226                                                                                                                                            | Transwell migration assay (5 and 10 µM)                                                                                                                                                                              | Curcumin suppressed proliferation and migration via inhibition of EGFR and the TLR4/MyD88 pathway                                                                                                               | (69)                                                                                                                                                                                                                          |       |
|                                      | Ephemeranthol A                                  | H460                                                                                                                                                 | Wound-healing assay (10, 50 and 100 µM)                                                                                                                                                                              | Ephemeranthol A suppressed migration and EMT by decreasing N-cadherin, vimentin, and Slug as well as inhibiting the activation of FAK and Akt                                                                   | (70)                                                                                                                                                                                                                          |       |
|                                      | Honokiol                                         | A549, H460, H226, H1299                                                                                                                              | Wound-healing assay Transwell migration and invasion assays (5, 10 and 20 µM)                                                                                                                                        | Honokiol suppressed migration by inhibition of PGE <sub>2</sub> and COX-2, leading to the inactivation of the β-catenin signalling pathway                                                                      | (71)                                                                                                                                                                                                                          |       |
|                                      |                                                  | A549, H460                                                                                                                                           | Wound-healing assay Transwell migration assay (30 µM)                                                                                                                                                                | Honokiol inhibited migration and EMT by targeting c-FLIP, resulting in the suppression of N-cadherin and Snail                                                                                                  | (72)                                                                                                                                                                                                                          |       |
|                                      |                                                  | A549                                                                                                                                                 | Transwell migration assay (45 µM)                                                                                                                                                                                    | miR-148a-5p and miR-148a-3p are potential biomarkers of honokiol-treated cells and, consequently, inhibited proliferation and migration, and induced apoptosis                                                  | (9)                                                                                                                                                                                                                           |       |
|                                      | Mangiferin                                       | A549, H460, H520                                                                                                                                     | Wound-healing assay Transwell migration assay (25 µg/mL)                                                                                                                                                             | Mangiferin inhibited migration, regulated EMT by upregulating the expression of PER1, mediated LPS-induced NLRP3 inflammasome expression, and the production of inflammatory cytokines                          | (30)                                                                                                                                                                                                                          |       |
|                                      | Phoyunnanin E                                    | H460, H292, A549                                                                                                                                     | Wound-healing assay Transwell invasion assay (1, 5 and 10 µM)                                                                                                                                                        | Phoyunnanin E inhibits the motility of cells via the suppression of EMT, migratory-associated integrins αv and β3, and FAK/Akt signals which in turn suppress downstream migratory proteins                     | (73)                                                                                                                                                                                                                          |       |
|                                      | Resveratrol                                      | A549                                                                                                                                                 | Transwell migration and invasion assays (50 µM)                                                                                                                                                                      | Resveratrol inhibited proliferation, migration, invasion, and promoted apoptosis by inhibiting the expression of STAT-3                                                                                         | (74)                                                                                                                                                                                                                          |       |
|                                      |                                                  |                                                                                                                                                      | Wound-healing assay Transwell invasion assay (25 µM)                                                                                                                                                                 | Resveratrol-induced Rad9 expression (mediated by DNA damage and ROS), significantly suppressed proliferation, migration, and invasion, and activated cellular senescence                                        | (75)                                                                                                                                                                                                                          |       |
|                                      | Rottlerin                                        | A549                                                                                                                                                 | Wound-healing assay Transwell invasion assay (1 and 3 µM)                                                                                                                                                            | Rottlerin hampered migration and invasion by inhibiting the expression of TAZ                                                                                                                                   | (76)                                                                                                                                                                                                                          |       |
|                                      | Flavonoids                                       | Acacetin                                                                                                                                             | A549                                                                                                                                                                                                                 | Wound-healing assay Transwell invasion assay Gelatin zymography (1, 2.5 and 5 µM)                                                                                                                               | Acacetin inhibited migration and invasion by preventing p38a phosphorylation via the MKK3/6 and/or the MLK3 signaling pathways. Additionally, it inhibited NF-κB and AP-1, causing suppression of MMP-2/9 and u-PA expression | (77)  |
| A549, 95D                            |                                                  |                                                                                                                                                      | Cell Migration Assay Kit (10, 25 and 50 µM)                                                                                                                                                                          | AFL suppressed NSCLC progression by inhibiting migration through Twist1                                                                                                                                         | (78)                                                                                                                                                                                                                          |       |
| Anthocyanins                         |                                                  | A549                                                                                                                                                 | Transwell migration and invasion assays Gelatin zymography (2.5, 50 and 100 µM)                                                                                                                                      | Anthocyanins decreased the expression of MMP-2, u-PA, TIMP-2, and PAI, causing the inhibition of migration and invasion in a dose-dependent manner                                                              | (40)                                                                                                                                                                                                                          |       |
|                                      |                                                  | H1299                                                                                                                                                | Wound-healing assay Transwell migration and invasion assays Gelatin zymography (10, 20 and 40 µM)                                                                                                                    | P3G inhibited invasion, motility, and secretion of MMP-2/9, and u-PA. These inhibitory effects might occur due to the inactivation of ERK 1/2 and AP-1 signalling pathways                                      | (79)                                                                                                                                                                                                                          |       |
|                                      |                                                  | Wound-healing assay Transwell migration and invasion assays (6.25 µM of individual anthocyanidins or their equimolar mixture 3.12, 6.25 and 12.5 µM) | The combination of anthocyanidins synergistically inhibited cell growth, invasion, and migration, and promoted cell-cycle arrest and apoptosis when compared to individual anthocyanins                              | (25)                                                                                                                                                                                                            |                                                                                                                                                                                                                               |       |
| Artonin E                            |                                                  | A549, H460, H292, H23                                                                                                                                | Wound-healing assay Transwell invasion assay (0.05, 0.1, 0.25, 0.5 µg/mL)                                                                                                                                            | Artonin E inhibited migration and invasion via suppression of activated FAK, downstream-activated Akt, and CDC42                                                                                                | (80)                                                                                                                                                                                                                          |       |
| BIO-A                                |                                                  | A549                                                                                                                                                 | Transwell invasion assay (20, 40 and 80 µM)                                                                                                                                                                          | BIO-A inhibited proliferation through down-regulating Ki-67 and VEGF, induced apoptosis by activation of Caspases-3 and 9, and suppressed cell migration by downregulating MMP-2 and VEGF                       | (82)                                                                                                                                                                                                                          |       |
| Cycloartobioxanthone                 |                                                  | H460                                                                                                                                                 | Wound-healing assay Transwell invasion assay (1, 5 and 10 µM)                                                                                                                                                        | Cycloartobioxanthone inhibited migration and invasion by suppressing several migratory-regulated mechanisms including FAK and CDC42 signaling, decreasing integrin α5, αv, and β3 levels, and inhibiting EMT    | (81)                                                                                                                                                                                                                          |       |
|                                      |                                                  | H292                                                                                                                                                 | Wound-healing assay Transwell migration and invasion assays (0.5, 1.5 and 2.5 µM)                                                                                                                                    | Deguelin inhibited migration and invasion through the inhibition of Ras, PKC, Akt, and NF-κB signaling pathway resulting in the down-regulation of MMP-2/9 and uPA                                              | (83)                                                                                                                                                                                                                          |       |
|                                      |                                                  | H23, H1299, A549                                                                                                                                     | Wound-healing assay Transwell invasion assay (200 and 500 nM)                                                                                                                                                        | Deguelin inhibits cell migration and invasion and by suppressing CtsZ expression and its downstream FAK/Src/Paxillin signaling                                                                                  | (84)                                                                                                                                                                                                                          |       |
| ECG                                  |                                                  | A549                                                                                                                                                 | Wound-healing assay Transwell migration and invasion assays Gelatin zymography (10, 30 and 50 µM)                                                                                                                    | ECG suppressed TGF-β1-induced EMT and invasion of cells by reducing expression levels of fibronectin, p-FAK, MMP-2 and u-PA                                                                                     | (46)                                                                                                                                                                                                                          |       |
|                                      |                                                  | A549                                                                                                                                                 | Wound-healing assay Transwell invasion assay (5, 10 and 20 µM)                                                                                                                                                       | EGCG inhibited TGF-β1-induced EMT via downregulation of phosphorylated Smad2 and ERK1/2                                                                                                                         | (85)                                                                                                                                                                                                                          |       |
| Fisetin                              |                                                  | A549                                                                                                                                                 | Wound-healing assay Transwell migration and invasion assays Gelatin zymography (1, 5 and 10 µM)                                                                                                                      | FIS suppressed adhesion, migration, and invasion via inhibition of ERK1/2 and downregulation of MMP-2 and u-PA at both protein and mRNA expression levels                                                       | (28)                                                                                                                                                                                                                          |       |
|                                      |                                                  |                                                                                                                                                      | Wound-healing assay Transwell invasion assay (10 and 40 µM)                                                                                                                                                          | FIS suppressed proliferation, migration, adhesion, and invasion                                                                                                                                                 | (48)                                                                                                                                                                                                                          |       |
|                                      |                                                  |                                                                                                                                                      | Wound-healing assay Transwell invasion assay (10 µM)                                                                                                                                                                 | The combination of FIS and paclitaxel significantly reduced cancer cell migration and invasion through a marked rearrangement of actin and vimentin cytoskeleton and the modulation of metastasis-related genes | (86)                                                                                                                                                                                                                          |       |
|                                      | A549, H1299                                      | Wound-healing assay Transwell invasion assay (5 and 10 µM)                                                                                           | FIS significantly inhibited migration, invasion and EMT through up-regulation of E-cadherin, ZO-1 and downregulation of vimentin, N-cadherin and MMP-2                                                               | (4)                                                                                                                                                                                                             |                                                                                                                                                                                                                               |       |
|                                      | A549, H460                                       | Wound-healing assay Transwell invasion assay (20 and 40 µM)                                                                                          | Genistein inhibited migration and invasion                                                                                                                                                                           | (87)                                                                                                                                                                                                            |                                                                                                                                                                                                                               |       |
| Hesperidin                           | A549, H460, H1975                                | Wound-healing assay Transwell migration and invasion assays (25, 37.5, 50 and 62.5 µg/mL)                                                            | Hesperidin inhibited the migratory and invasive capabilities by mediating the SDF-1/CXCR-4 signalling pathway                                                                                                        | (88)                                                                                                                                                                                                            |                                                                                                                                                                                                                               |       |
| Hydroxyxafflor yellow A              | A549, H1299                                      | Wound-healing assay Transwell migration and invasion assays (5, 10 and 20 µM)                                                                        | HYSA inhibited migration, invasion, and EMT by suppressing PI3K/Akt/mTOR and ERK/MAPK signaling pathways                                                                                                             | (89)                                                                                                                                                                                                            |                                                                                                                                                                                                                               |       |
| Luteolin                             | A549                                             | Wound-healing assay (50 µM)                                                                                                                          | Luteolin disrupted cell migration through the prevention of stress fiber formation                                                                                                                                   | (90)                                                                                                                                                                                                            |                                                                                                                                                                                                                               |       |
| Morin                                | A549                                             | Transwell migration assay (50 µM)                                                                                                                    | Morin decreased cell viability, colony formation, and migration rate through the downregulation of miR-135b that directly targets and represses CCG2                                                                 | (10)                                                                                                                                                                                                            |                                                                                                                                                                                                                               |       |
| Myricetin                            | A549                                             | Wound-healing assay Gelatin zymography (50 and 100 µM)                                                                                               | Myricetin inhibited migration by reducing MMP-2/9 expressions via inhibition of the FAK/ERK signaling pathway                                                                                                        | (91)                                                                                                                                                                                                            |                                                                                                                                                                                                                               |       |
| Quercetin                            | A549, HCC827                                     | Wound-healing assay Transwell migration and invasion assays (10, 25 and 50 µM)                                                                       | Quercetin inhibited metastasis by suppressing the Snail-mediated EMT                                                                                                                                                 | (31)                                                                                                                                                                                                            |                                                                                                                                                                                                                               |       |
| Scutellaria Flavonoids               | A549, H1299                                      | Transwell invasion assay (80 µM)                                                                                                                     | Baicalin significantly inhibited cell invasion and EMT by upregulating the mRNA and protein expression of E-cadherin and downregulating the Twist1 and Vimentin expression                                           | (93)                                                                                                                                                                                                            |                                                                                                                                                                                                                               |       |
|                                      |                                                  | Wound-healing assay Transwell invasion assay (baicalin 200 µM, baicalin 10 µM and wogonin 40 µM)                                                     | Baicalin, baicalin, and wogonin activated Rap1-GTP binding and dephosphorylated Akt and Src by suppressing a7nAChR, consequently triggering inhibition of IκB and thus blocking proliferation, EMT, and angiogenesis | (94)                                                                                                                                                                                                            |                                                                                                                                                                                                                               |       |
|                                      | A549, 95D                                        | Wound-healing assay Transwell invasion assay (4, 8, 16 µM)                                                                                           | OA inhibited the invasion and migration of tumour cells by suppressing Snail via inhibition of the ERK/GSK-3β signalling pathway                                                                                     | (92)                                                                                                                                                                                                            |                                                                                                                                                                                                                               |       |
| Sotetsuflavone                       | H1650                                            | Wound-healing assay Transwell invasion assay (64 and 128 µM)                                                                                         | Sotetsuflavone was able to inhibit proliferation, migration, and invasion                                                                                                                                            | (95)                                                                                                                                                                                                            |                                                                                                                                                                                                                               |       |
| Bibenzyls                            | Chrysotobenzyl                                   | H460, H292                                                                                                                                           | Wound-healing assay Transwell migration and invasion assays (1, 5, 10 and 50 µM)                                                                                                                                     | Chrysotobenzyl inhibited cell migration via depletion of Cav-1, integrins β1, β3, and αv and also suppressed EMT                                                                                                | (27)                                                                                                                                                                                                                          |       |
|                                      |                                                  | H460, H292                                                                                                                                           | Wound-healing assay Transwell migration and invasion assays (5, 10 and 20 µM)                                                                                                                                        | Gigantol suppressed the migratory behaviour through a Cav-1-dependent pathway.                                                                                                                                  | (29)                                                                                                                                                                                                                          |       |
|                                      |                                                  | H460                                                                                                                                                 | Wound-healing assay Transwell migration and invasion assays (1, 5, 10 and 20 µM)                                                                                                                                     | Gigantol suppressed EMT, resulting in a reduction of migration                                                                                                                                                  | (96)                                                                                                                                                                                                                          |       |
|                                      | Moscattin                                        | H23                                                                                                                                                  | Wound-healing assay Transwell migration and invasion assays (0.25, 0.5 and 1 µM)                                                                                                                                     | Moscattin inhibited cell migration and invasion through attenuation of endogenous ROS                                                                                                                           | (97)                                                                                                                                                                                                                          |       |
|                                      | Riccardin D                                      | A549                                                                                                                                                 | Wound-healing assay Transwell invasion assay Gelatin Zymography (2.5, 5, 10 and 20 µM)                                                                                                                               | The ability of invasion and migration was suppressed upon exposure to riccardin D, and MMP-2/9 levels were significantly decreased                                                                              | (98)                                                                                                                                                                                                                          |       |
|                                      | TDB                                              | H292                                                                                                                                                 | Wound-healing assay Transwell migration and invasion assays (0.5, 1 and 5 µM)                                                                                                                                        | TDB reduced cell migration and invasion by decreasing migration-regulated proteins, including integrins αv, α4, β1, β3, and β5, as well as downstream signalling proteins, such as pFAK, Rac1, GTP, and CDC42   | (39)                                                                                                                                                                                                                          |       |
|                                      | Terpenes                                         | Actein                                                                                                                                               | A549, 95D                                                                                                                                                                                                            | Wound-healing assay Transwell migration and invasion assays (20 and 40 µM)                                                                                                                                      | Actein suppressed cell migration and invasion                                                                                                                                                                                 | (99)  |
|                                      |                                                  |                                                                                                                                                      | A549                                                                                                                                                                                                                 | Wound-healing assay Transwell invasion assay (6 and 9 nM)                                                                                                                                                       | Alisol B suppressed cell migration and invasion through the inhibition of the PI3K/AKT/mTOR pathway                                                                                                                           | (101) |
| Betulin                              |                                                  | H460                                                                                                                                                 | Wound-healing assay Transwell invasion assay Gelatin zymography (11 and 30 µM)                                                                                                                                       | Betulin suppressed migration and invasion by inhibiting MMP-2/9                                                                                                                                                 | (102)                                                                                                                                                                                                                         |       |
| Fronodoside A                        |                                                  | LN3M5                                                                                                                                                | Wound-healing assay Transwell invasion assay (0.1 and 0.5 µM)                                                                                                                                                        | Fronodoside A inhibited cell migration, invasion and angiogenesis                                                                                                                                               | (100)                                                                                                                                                                                                                         |       |
| Nagilactone E                        |                                                  | A549                                                                                                                                                 | Transwell migration and invasion assays (2 and 4 µM)                                                                                                                                                                 | NLE inhibited TGF-β1-stimulated cell migration and invasion by suppressing Smad2 and Smad3, thus suppressing EMT                                                                                                | (103)                                                                                                                                                                                                                         |       |
| Triptolide                           |                                                  | A549, H460, H358                                                                                                                                     | Transwell migration and invasion assays (10 nM)                                                                                                                                                                      | Triptolide altered the expression of microRNAs involved in cellular movement and decreased migration and invasion by reducing FAK expression which impaired its downstream signalling                           | (36)                                                                                                                                                                                                                          |       |
| Ursolic acid                         |                                                  | H1975                                                                                                                                                | Wound-healing assay (25 µM)                                                                                                                                                                                          | Ursolic acid induced apoptosis, and inhibited cell migration and proliferation by negatively regulating the β-catenin/TCF4/CT45A2 signalling pathway                                                            | (104)                                                                                                                                                                                                                         |       |
| Alkaloids                            |                                                  | Daurinoline                                                                                                                                          | A549                                                                                                                                                                                                                 | Wound-healing assay Transwell invasion assay (5, 10 and 20 µM)                                                                                                                                                  | Daurinoline inhibited the proliferation, migration, invasion, and EMT phenotype of chemo-resistant cells by reversing EMT and Notch-1                                                                                         | (105) |
|                                      |                                                  |                                                                                                                                                      | A549, H460                                                                                                                                                                                                           | Wound-healing assay (5, 7.5, 10 and 20 µM)                                                                                                                                                                      | Krukovine suppressed migration by preventing the phosphorylation of ERK, AKT, PI3K, mTOR, C-RAF, and p70s6k                                                                                                                   | (106) |
|                                      |                                                  | Oxymatrine                                                                                                                                           | A549                                                                                                                                                                                                                 | Transwell migration and invasion assays (1 mg/mL)                                                                                                                                                               | OMT inhibited cancer progression and metastasis by upregulation of miR-520 and downregulation of VEGF                                                                                                                         | (11)  |
|                                      |                                                  | Wound-healing assay (1.5 and 2 mg/mL)                                                                                                                | OMT inhibited cell migration                                                                                                                                                                                         | (107)                                                                                                                                                                                                           |                                                                                                                                                                                                                               |       |
| Steroids                             |                                                  | Bufalin                                                                                                                                              | H460                                                                                                                                                                                                                 | Transwell migration and invasion assays Gelatin zymography (25, 50, 100 and 200 nM)                                                                                                                             | Bufalin inhibited invasion and migration by suppressing NF-κB and MMP-2/9                                                                                                                                                     | (26)  |
|                                      |                                                  |                                                                                                                                                      | Wound-healing assay Transwell migration and invasion assays (2.5, 5 and 10 nM)                                                                                                                                       | Under sub-lethal concentrations, bufalin significantly inhibited cell adhesion, migration, and invasion of gefitinib-resistant H460 cells                                                                       | (109)                                                                                                                                                                                                                         |       |
|                                      | A549                                             | Wound-healing assay Transwell migration assay (50 nM)                                                                                                | Bufalin suppressed TGF-β-induced EMT and migration by downregulating TJR1 and TJR11                                                                                                                                  | (108)                                                                                                                                                                                                           |                                                                                                                                                                                                                               |       |
|                                      | Cardenolides                                     | A549                                                                                                                                                 | Wound-healing assay Transwell invasion assay (10 and 50 nM)                                                                                                                                                          | DXG and CON demonstrated anti-proliferative activity and decreased migration and invasion by suppressing MMP-2/9 and p-FAK expression                                                                           | (110)                                                                                                                                                                                                                         |       |
| Ophiopogonin B                       | A549                                             | Wound-healing assay Transwell migration and invasion assays (2.5, 5 and 10 µM)                                                                       | OP-B significantly reduced invasion and migration through inhibition of EphA2/Akt and the corresponding signaling pathway                                                                                            | (111)                                                                                                                                                                                                           |                                                                                                                                                                                                                               |       |
| Others                               | Coix polysaccharides                             | A549                                                                                                                                                 | Wound-healing assay Transwell invasion assay (200 and 300 µg/mL)                                                                                                                                                     | Coix polysaccharides inhibited migration and invasion by downregulating the expression of S100A4                                                                                                                | (112)                                                                                                                                                                                                                         |       |
|                                      |                                                  | PC9, H1975                                                                                                                                           | Wound-healing assay Transwell invasion assay (10, 20 and 40 µM)                                                                                                                                                      | CD can affect proliferation, migration, invasion, cell cycle, and apoptosis through the activation of AMP-activated protein kinase and subsequent inhibition of mTOR                                            | (113)                                                                                                                                                                                                                         |       |
|                                      | Dihydroaustrostrafullone alcohol                 | A549                                                                                                                                                 | Wound-healing assay Transwell migration assay Gelatin zymography (20, 30 and 40 µg/mL)                                                                                                                               | Dihydroaustrostrafullone alcohol inhibited invasion and migration through suppression of the ERK1/2 signalling pathway resulting in a decrease in MMP-2/9 activities                                            | (114)                                                                                                                                                                                                                         |       |
|                                      | Esculetin                                        | A549                                                                                                                                                 | Transwell invasion assay (5 and 20 µM)                                                                                                                                                                               | Esculetin inhibited the proliferation and regulated EMT via the downregulation of vimentin and Snail, and up-regulation of E-cadherin                                                                           | (115)                                                                                                                                                                                                                         |       |
|                                      | Evodiamine                                       | A549                                                                                                                                                 | Wound-healing assay (4 and 8 µM)                                                                                                                                                                                     | Evodiamine suppressed cell migration                                                                                                                                                                            | (116)                                                                                                                                                                                                                         |       |
|                                      | Ganoderan                                        | A549                                                                                                                                                 | Wound-healing assay Transwell invasion assay (0.25, 0.5 and 1 mg/mL)                                                                                                                                                 | Ganoderan inhibited migration, invasion and EMT via the ERK signalling pathway                                                                                                                                  | (117)                                                                                                                                                                                                                         |       |
|                                      | Glycyrol                                         | A549                                                                                                                                                 | Wound-healing assay (2.5, 5 and 7.5 µM)                                                                                                                                                                              | Glycyrol suppressed migration                                                                                                                                                                                   | (118)                                                                                                                                                                                                                         |       |
|                                      | Goniothalamin                                    | H1299                                                                                                                                                | Wound-healing assay Gelatin Zymography (1, 2, 5 and 10 µg/mL)                                                                                                                                                        | GTN attenuated cell migration and caused a reduction in the activity levels of MMP-2/9 due to its DNA-damaging effect                                                                                           | (119)                                                                                                                                                                                                                         |       |
|                                      | Isothiocyanates                                  | A549, SK-MES-1                                                                                                                                       | Wound-healing assay Transwell invasion assay (20 µM)                                                                                                                                                                 | PEITC suppressed migration and invasion by regulating MMP-2 and induced autophagy as well as suppressed the JAK2/STAT3 pathway                                                                                  | (121)                                                                                                                                                                                                                         |       |
|                                      |                                                  | A549                                                                                                                                                 | Wound-healing assay Transwell invasion assay (5, 10 and 15 µM)                                                                                                                                                       | SFN-Cys inhibited invasion via microtubule-mediated Claudins dysfunction, but SFN-NAC inhibited invasion via microtubule-mediated inhibition of autolysosome formation                                          | (120)                                                                                                                                                                                                                         |       |
|                                      |                                                  | H1299, 95D, 95C                                                                                                                                      | Transwell migration and invasion assays (1, 1.5 and 5 µM)                                                                                                                                                            | Sulfuraphane inhibited migration and invasion by hampering EMT, through a decrease in the levels of miR-616-5p, which resulted in suppression of the GSK3β/β-catenin signalling pathway                         | (12)                                                                                                                                                                                                                          |       |
|                                      |                                                  | A549, H1299                                                                                                                                          | Wound-healing assay Transwell migration and invasion assays (1, 2 and 3 µM)                                                                                                                                          | Sulfuraphane inhibits migration and invasion via ERK5 activation, resulting in an increase in the expressions of E-cadherin and ZO-1 and a decrease in N-cadherin and Snail1                                    | (122)                                                                                                                                                                                                                         |       |
|                                      | Magnolin                                         | A549, H1975                                                                                                                                          | Wound-healing assay Transwell migration and invasion assays Gelatin Zymography (15, 30 and 60 µM)                                                                                                                    | Magnolin suppresses cell migration and invasion by targeting the ERKs/RSK2 signaling pathway. It also modulated EMT marker proteins such as N-cadherin, E-cadherin, Vimentin, and MMPs                          | (123)                                                                                                                                                                                                                         |       |
|                                      | Methylene chloride extracts of <i>Morus alba</i> | H1299, H460, A549                                                                                                                                    | Wound-healing assay Transwell migration and invasion assays (5, 10 and 25 µg/mL)                                                                                                                                     | MEMA inhibited the migratory activity of cells through blockage of Src/STAT3-mediated EMT                                                                                                                       | (32)                                                                                                                                                                                                                          |       |
|                                      | Renieramycin M                                   | H460                                                                                                                                                 | Wound-healing assay Transwell invasion assay (0.5 and 2.5 µM)                                                                                                                                                        | Renieramycin M decreased migration and invasion                                                                                                                                                                 | (124)                                                                                                                                                                                                                         |       |
| Salidroside                          | A549                                             | Transwell migration and invasion assays (800 µM)                                                                                                     | Salidroside inhibited migration and invasion by decreasing the expressions of MMP-2, RhoA, ROCK1, and vimentin                                                                                                       | (125)                                                                                                                                                                                                           |                                                                                                                                                                                                                               |       |
| Sodium new houttuynonate             | A549, H1299                                      | Wound-healing assays Transwell invasion assays (0.1, 0.2 and 0.4 mM)                                                                                 | SNH decreased cell metastasis and invasion by suppressing EMT progression                                                                                                                                            | (126)                                                                                                                                                                                                           |                                                                                                                                                                                                                               |       |
| Δ <sup>5</sup> -Tetrahydrocannabinol | A549, SW-1573                                    | Wound-healing assay Transwell migration and invasion assays (5, 10 and 15 µM)                                                                        | THC treatment inhibits EGF-induced cell motility and invasion                                                                                                                                                        | (127)                                                                                                                                                                                                           |                                                                                                                                                                                                                               |       |
| Thymoquinone                         | A549                                             | Wound-healing assay Transwell invasion assay Gelatin zymography (10, 20 and 40 µM)                                                                   | TQ suppressed the proliferation, migration, and invasion by inhibiting PCNA, cyclin D1, MMP-2/9                                                                                                                      | (45)                                                                                                                                                                                                            |                                                                                                                                                                                                                               |       |

\*7-nAChRs, alpha-7 nicotinic receptor; AFK, atalantrafalvone; Akt, protein kinase B; AP-1, activation protein 1; BIO-A, Biocharin A; Cav-1, Caveolin 1; CCG2, Cycilin-G2; CD, Cordycepin; CDC42, cell division control protein 42; c-FLIP, Cellular Fas-associated death domain-like IL-1 beta-converting enzyme inhibitor protein; CON, convallatoxin; COX-2, cyclooxygenase-2; C-RAF, RAF proto-oncogene serine/threonine-protein kinase; CT45A2, cancer/testis antigen family 45 member A2; CtsZ, Cathepsin Z; CXCR-4, C-X-C chemokine receptor type 4; DGX, digitoxigenin monodigitoxoside; ECG, Epicatechin-3-gallate; EGCG, Epigallocatechin-3-gallate; EGFR, epidermal growth factor receptor; EMT, epithelial-to-mesenchymal transition; EphA2, Ephrin type-A receptor 2; ERK 1/2, extracellular signal-regulated kinases 1 and 2; FAK, focal adhesion kinase; FIS, fisetin; GSK-3β, glycogen synthase kinase 3 beta; GTN, Goniothalamin; HYSA, Hydroxyxafflor yellow A; IκB, inhibitor of differentiation 1; JAK2, Janus kinase 2; MAPK, mitogen-activated protein kinase; MEMA, Methylene chloride extracts of *Morus alba*; MHMM-41, (3E,5E)-3-[(1H-indol-3-yl)methylene]-5-(3-hydroxy-4-methoxybenzylidene)-1-methylpiperidin-4-one (MHMM-41); MKK3/6, Mitogen-activated protein kinase kinase; MMPs, matrix metalloproteinases; mTOR, mammalian target of rapamycin; MyD88, Myeloid differentiation primary response 88; NF-κB, nuclear factor kappa B; NLE, nagilactone E; NLRP3, NLR family pyrin domain containing 3; OA, oroxylin A; OMT, Oxymatrine; OP-B, Ophiopogonin B; P3G, Pelargonidin-3-O-glucoside; PAI, plasminogen activator inhibitor; PAK1, Serine/threonine-protein kinase; PCNA, Proliferating cell nuclear antigen; PDGF-BB, Platelet-derived growth factor; PEITC, Phenethyl isothiocyanate; PER1, period circadian protein homolog 1 protein; pFAK, focal adhesion kinase; PGE2, prostaglandin E2; PI3K, Phosphoinositide 3-kinase; PKC, protein kinase C; Rac1, Ras-related C3 botulinum toxin substrate 1; Rap1, Repressor Activator Protein 1; RhoA, Ras homolog family member A; ROCK1, Rho Associated Coiled-Coil Containing Protein Kinase 1; ROS, reactive oxygen species; RSK2, ribosomal S6 kinase-2; S100A4, S100 calcium binding protein A4; SDF-1, stromal cell-derived factor 1; SFN-Cys, sulfuraphane-cysteine; SFN-NAC, sulfuraphane-N-acetyl-L-cysteine; SNH, Sodium new houttuynonate; Src, Proto-oncogene tyrosine-protein kinase Src; STAT-3, signal transducer and activator of transcription 3; TAZ, transcriptional co-activator with PDZ-binding motif; TjR/II, TGF-β receptor I/II; TGF-β, T-cell factor 4; TDB, 4,5,40-trihydroxy-3,30-dimethoxybibenzyl; (TGF)-β1, transforming growth factor; THC, Δ9-Tetrahydrocannabinol; TIMP-2, tissue inhibitor of matrix metalloproteinase-2; TLR4, Toll-like receptor 4; TQ, Thymoquinone; u-PA, urokinase plasminogen activator; VEGF, Vascular endothelial growth factor; ZO-1, Tight junction protein 1. \*\*In some reports not all the concentrations indicated in this table were used for all the migration/invasion experiments. \*\*Herein are presented the key findings reported by the authors related to migration/invasion and underlying mechanisms, using essentially migration/invasion related assays. Nonetheless, some of these findings were obtained using other methodologies not provided in this table. In the original manuscript, other findings not related to migration/invasion were also reported.
